# 1     **A Mechanistic Insight into Sources of Error of Visual Working** 2                                   **Memory in Multiple Sclerosis**

3  
4  
5     Ali Motahharynia,<sup>1,2†</sup> Ahmad Pourmohammadi,<sup>1,2,4†</sup> Armin Adibi,<sup>1,2</sup> Vahid Shaygannejad,<sup>1,2,3</sup>  
6                                   Fereshteh Ashtari,<sup>1,2,3</sup> Iman Adibi,<sup>1,2,3\*</sup> and Mehdi Sanayei<sup>1,2,4\*</sup>

## 7 8 9     **Author affiliations:**

- 10    1. Center for Translational Neuroscience, Isfahan University of Medical Sciences, Isfahan, 81839 83434, Iran  
11    2. Isfahan Neuroscience Research Center, Isfahan University of Medical Sciences, Isfahan, 81839 83434, Iran  
12    3. Department of Neurology, School of Medicine, Isfahan University of Medical Sciences, Isfahan, 81746 75731, Iran  
13    4. School of Cognitive Sciences, Institute for Research in Fundamental Sciences (IPM), Tehran, 19568 36484, Iran

14  
15  
16    \* Corresponding authors:

17    Mehdi Sanayei

18    School of Cognitive Sciences, Institute for Research in Fundamental Sciences (IPM), Tehran, 1956836484, Iran, Tel:  
19    +98 212 611 3274

20    Email: mehdi.sanayei@gmail.com

21    Iman Adibi

22    Department of Neurology, School of Medicine, Isfahan University of Medical Sciences, Isfahan, 81746 75731, Iran,  
23    Tel: +98 313 620 1286

24    Email: i.adibi@gmail.com

25    ORCID: 0000-0003-4409-9404

26  
27    †These authors contributed equally to this work.

## 28 **Abstract**

29 Working memory (WM) is one of the most affected cognitive domains in multiple sclerosis (MS),  
30 which is mainly studied by the previously established binary model for information storage (slot  
31 model). Recent observations based on the continuous reproduction paradigms showed that  
32 assuming dynamic allocation of WM resources (resource model) instead of the binary hypothesis  
33 will give more accurate predictions in WM assessment. However, they have not been employed in  
34 the field of MS despite their influence in uncovering novel mechanistic insights into the WM  
35 organization. Here, by utilizing two continuous reproduction paradigms, we investigated WM  
36 dysfunction in MS. Also, by applying a computational model, the underlying structure of WM  
37 dysfunction was further explored.

38 A total of 121 patients with MS (61 relapsing-remitting and 60 secondary progressive) and 73  
39 healthy controls were enrolled in this study. The precision of visual WM was measured using  
40 memory-guided localization (MGL) and n-back paradigms. The classifying performance of these  
41 paradigms in distinguishing different groups was assessed using receiver operating characteristic  
42 analysis. Moreover, the sources of error in information recall were evaluated by computational  
43 modeling on n-back results.

44 Our findings determined an overall decrease in recall precision and increased recall variability in  
45 MS. While the classifying performance of MGL was better in distinguishing MS subtypes, n-back  
46 paradigms were more accurate in discriminating healthy control from relapsing-remitting MS. The  
47 applied model showed that decreased signal-to-noise ratio and misbinding error were responsible  
48 for WM deficits in these patients.

49 In conclusion, our results determined the magnitude of WM deficit and demonstrated misbinding  
50 error as an important component of WM dysfunction in MS. The dissociable functions of these  
51 paradigms in classifying MS subtypes provided evidence about the underlying mechanisms of WM  
52 deficits in progressive states of the disease.

53

54

55

56 **Keywords:** Binding; Multiple sclerosis; Resource model; Swap error; Working memory

## 57 Introduction

58 Multiple sclerosis (MS) is a debilitating inflammatory disorder characterized by demyelinating  
59 central nervous system (CNS) plaques creating a progressive neurodegenerative state with  
60 heterogeneous clinical characteristics.<sup>1,2</sup> Impairment in cognitive function is a common clinical  
61 manifestation of MS, which detrimentally affects different aspects of patients' daily life, from  
62 decreased physical performance and productivity to unemployment.<sup>2,3</sup> One of the frequently  
63 affected domains of cognition in MS is working memory (WM),<sup>4</sup> which due to its essential role in  
64 several cognitive processes,<sup>5,6</sup> is one of the main areas of MS research.<sup>4,7-10</sup>

65 Multiple neuropsychological cognitive paradigms, such as paced auditory serial addition test  
66 (PASAT), n-back, and delayed-match to sample, were developed to investigate different aspects  
67 of WM deficit in MS.<sup>4,9-13</sup> The basis of these change detection paradigms is the slot model of  
68 WM.<sup>14</sup> In this quantized model, WM is considered as a short-term storage for a limited number of  
69 items,<sup>14-16</sup> in which the information is stored in a binary format. This assumption created an all-  
70 or-none condition in which only the stored items in these limited slots will be remembered.<sup>14</sup>  
71 Nonetheless, recent observations from analog recall paradigms assessing the precision of WM  
72 determined the dynamic allocation of WM resources.<sup>17-20</sup> Each stored item in this framework  
73 possesses a fraction of WM storage in which the allocated space changes dynamically between  
74 them.<sup>14,17,20</sup> This concept is the foundation for the resource-based model of WM.

75 The analog nature of inputs in resource-based model paradigms makes it possible to investigate  
76 the resolution and variability of stored memory.<sup>21,22</sup> Also, measuring the sources of error using  
77 analog cued (connected features) recall paradigms further helped in uncovering the underlying  
78 structure of visual WM system.<sup>21,23-26</sup> An analog cued recall task is a paradigm in which subjects  
79 need to simultaneously recall an item with its binding feature in a continuous space, hence  
80 requiring encoding the information of connected features in addition to their distinct value (e.g.,  
81 object, location, and object-location binding information).<sup>21,23,24</sup> According to the study of Bays et  
82 al., there are three different sources of error for recalling information in visual WM tasks with  
83 connected features.<sup>18</sup> They are identified as i: the Gaussian variability in response around the target  
84 value (imprecision due to noisiness), ii: Gaussian variability in response around the non-target  
85 value, i.e., mistakenly reporting feature of other presented items (misbinding or swap error), and  
86 iii: random responses (uniform error).<sup>18,23</sup>

87 Studies based on analog-cued recall paradigms unraveled new insights into the sources of recall  
88 error in neurodegenerative disorders. It was determined that random guessing and misbinding  
89 contribute to the impairment of visual WM in Parkinson's and Alzheimer's diseases,  
90 respectively.<sup>23,26</sup> However, regardless of the huge impact of these study designs on discovery of  
91 novel mechanistic insights into the organization of visual WM system, it has not gotten enough  
92 attention in the field of MS research.

93 The current study followed our previous study in which the quantity of MS-related visual WM  
94 was assessed using the slot model.<sup>12</sup> Here we aimed to evaluate recall precision (quality) using the  
95 resource model. In this regard, we developed two analog recall paradigms, a memory-guided  
96 localization (MGL) and two n-back tasks (1-back and 3-back). Primarily using the simplistic  
97 design of MGL, the recall error and precision of visual WM in MS were assessed. Similarly, recall  
98 error and precision were evaluated using the two designed n-back paradigms, i.e., the low memory  
99 load, 1-back, and high memory load, 3-back conditions, respectively. Moreover, the classifying  
100 performance of these paradigms in distinguishing different groups was assessed. Finally, using the  
101 probabilistic model of Bays, Catalao & Husain,<sup>18</sup> the sources of recall error in n-back paradigms  
102 were further investigated. In both MGL and n-back (low and high memory load conditions)  
103 paradigms, recall error and precision were impaired in MS. The dissociable function of these  
104 paradigms in classifying MS subtypes (relapsing-remitting and secondary progressive) gave some  
105 clues about the underlying structure of WM deficit in progressive states of the disease.  
106 Investigation into the sources of error in a high memory load condition revealed that recall fidelity  
107 and misbinding, and not random guessing, contribute to visual WM dysfunction in MS.

## 108 **Results**

109 In the memory-guided localization (MGL) paradigm, 45 patients (19 relapsing-remitting MS,  
110 RRMS, and 26 secondary progressive MS, SPMS) and 24 healthy controls participated. The mean  
111 data of five participants (one healthy control, three RRMS, and one SPMS) were excluded from  
112 further analysis as mentioned in the Method. In the 3-back paradigm, from a total of 76 patients  
113 (42 RRMS and 34 SPMS) and 49 healthy control who participated, three healthy control, three  
114 RRMS, and two SPMS were excluded. The demographic and clinical data of participants were  
115 summarized in Tables 1A and 1B.

## 116 **Recall Error in Multiple Sclerosis**

117 In the MGL paradigm, using a mixed-model analysis of variance (ANOVA), we evaluated recall  
118 error as a function of distance. Recall error was significantly different between groups [ $F(2,61) =$   
119  $14.57, P < 10^{-5}$ ] and distance ([ $F(2,61) = 85.03, P < 10^{-23}$ ], Fig. 2A). A significant interaction was  
120 also observed between groups and distance [ $F(4,61) = 7.24, P < 10^{-4}$ ]. Tukey post hoc test  
121 determined that recall error was significantly higher in SPMS [ $1.86^\circ \pm 0.92^\circ$  visual degree]  
122 compared to healthy control [ $0.97 \pm 0.26, P < 10^{-4}$ ] and RRMS [ $1.09 \pm 0.27, P < 10^{-3}$ ]. No  
123 significant difference was detected between RRMS and healthy control [ $P = 0.83$ ]. Similarly, recall  
124 error as a function of delay interval was also evaluated. Recall error was significantly different  
125 between delay intervals ([ $F(4,61) = 18.89, P < 10^{-12}$ ], Fig. 2D). No significant interaction was  
126 observed between groups and delay intervals [ $F(8,61) = 0.69, P = 0.70$ ].

127 While reaction time (RT) was significantly different between groups [ $F(2,61) = 26.44, P < 10^{-8}$ ]  
128 and distance ([ $F(2,61) = 25.94, P < 10^{-9}$ ], Fig. 2C), it was not significantly different between delay  
129 intervals ([ $F(4,61) = 0.97, P = 0.43$ ], Fig. 2F). No significant interaction was observed between  
130 groups and distance [ $F(4,61) = 2.06, P = 0.09$ ] or groups and delay intervals [ $F(8,61) = 0.86, P =$   
131  $0.55$ ]. The statistical results of RT were summarized in Supplementary Table 1A.

132 Recall error was evaluated for n-back paradigm using the same method. In the 'high memory load'  
133 condition (i.e., 3-back paradigm), recall error was significantly different between groups [ $F(2,114)$   
134  $= 28.18, P < 10^{-9}$ ] and bar order ([ $F(2,114) = 48.74, P < 10^{-17}$ ], Fig. 2G). No significant interaction  
135 was observed between them [ $F(4,114) = 1.21, P = 0.31$ ]. Tukey post hoc test showed that recall  
136 error was significantly higher in RRMS [ $0.68 \pm 0.20$  radian] and SPMS [ $0.76 \pm 0.17$ ] compared to  
137 healthy control [ $0.48 \pm 0.16, P < 10^{-5}, P < 10^{-8}$ , respectively]. However, no significant difference  
138 was detected between RRMS and SPMS groups [ $P = 0.14$ ]. After adjusting for gender, age, and  
139 education (they were significantly different between groups), the groups' effect on recall error  
140 remained significant (Supplementary Table 2A). Moreover, while RT was also significantly  
141 different between groups [ $F(2,114) = 12.95, P < 10^{-5}$ ] and bar order ([ $F(2,114) = 5.92, P < 0.004$ ],  
142 Fig. 2I), no significant interaction was observed between groups and bar order [ $F(4,114) = 0.16,$   
143  $P = 0.96$ ]. The statistical results of RT were summarized in Supplementary Table 1B.

144 In the 'low memory load' condition (i.e., 1-back paradigm), recall error was significantly different  
145 between groups ([ $F(2,114) = 36.85, P < 10^{-12}$ ], Fig. 2G). Tukey post hoc test showed that recall  
146 error was significantly higher in RRMS [ $0.33 \pm 0.12$  radian] and SPMS [ $0.43 \pm 0.12$ ] compared to

147 healthy control [ $0.22 \pm 0.08$ ,  $P < 10^{-4}$ ,  $P < 10^{-8}$ , respectively]. We also observed a significant  
148 difference between RRMS and SPMS [ $p < 10^{-3}$ ]. After adjusting for gender, age, and education,  
149 the group effect on recall error remained significant (Supplementary Table 2B). Correspondingly,  
150 RT differed significantly between groups ( $[F(2,114) = 12.59$ ,  $P < 10^{-4}$ ], Fig. 2I). The statistical  
151 results of RT were summarized in Supplementary Table 1B.

## 152 **Recall Precision in Multiple Sclerosis**

153 In the MGL paradigm, recall precision was also significantly different between groups [ $F(2,61) =$   
154  $13.74$ ,  $P < 10^{-4}$ ] and distance ( $[F(2,61) = 23.39$ ,  $P < 10^{-8}$ ], Fig. 2B). No significant interaction was  
155 observed between groups and distance [ $F(4,61) = 0.91$ ,  $P = 0.46$ ]. Post hoc analysis determined  
156 recall precision was significantly lower in SPMS [ $0.87 \pm 0.52$  /°] than in both RRMS [ $1.32 \pm 0.51$ ,  
157  $P < 0.039$ ] and healthy control [ $1.70 \pm 0.60$ ,  $P < 10^{-5}$ ]. Recall precision was not significantly  
158 different between RRMS and healthy control [ $P = 0.08$ ]. We also determined the effects of delay  
159 intervals on recall precision. In this analysis, groups [ $F(2,61) = 14.57$ ,  $P < 10^{-5}$ ], delay intervals  
160 [ $F(4,61) = 7.30$ ,  $P < 10^{-4}$ ], and their interaction [ $F(8,61) = 2.44$ ,  $P < 0.02$ ] had significant effects  
161 on recall precision (Fig. 2E). Post hoc analysis showed the same pattern of result [SPMS =  $0.84 \pm$   
162  $0.47$  /°; RRMS =  $1.39 \pm 0.46$ ; healthy =  $1.63 \pm 0.61$ ; SPMS vs. RRMS:  $P < 0.005$ ; SPMS vs.  
163 healthy:  $P < 10^{-5}$ , RRMS vs. healthy:  $P = 0.34$ ]. Similarly, in the 'high memory load' condition,  
164 recall precision was significantly different between groups ( $[F(2,114) = 25.23$ ,  $P < 10^{-9}$ ], Fig. 2H)  
165 and bar order [ $F(2,114) = 20.70$ ,  $P < 10^{-8}$ ]. However, no significant interaction was observed  
166 between them [ $F(4,114) = 1.84$ ,  $P = 0.12$ ]. Besides, while in post hoc analysis, recall precision  
167 was significantly higher in healthy control [ $2.39 \pm 0.78$  /radian] than in both RRMS [ $1.68 \pm 0.50$ ,  
168  $P < 10^{-6}$ ] and SPMS patients [ $1.52 \pm 0.31$ ,  $P < 10^{-7}$ ], no difference was observed between RRMS  
169 and SPMS participants [ $P = 0.49$ ]. After adjusting for gender, age, and education, the effect of  
170 groups on recall precision remained significant (Supplementary Table 2A).

171 Accordingly, the 'low memory load' condition showed the same pattern. Recall precision  
172 significantly differed between groups ( $[F(2,114) = 25.48$ ,  $P < 10^{-9}$ ], Fig. 2H). Post hoc analysis  
173 determined that recall precision was significantly higher in healthy control [ $6.10 \pm 2.41$  /radian]  
174 than in RRMS [ $4.16 \pm 1.98$ ,  $P < 10^{-4}$ ] and SPMS [ $2.95 \pm 1.05$ ,  $P < 10^{-8}$ ]. Moreover, there was a  
175 significant difference between RRMS and SPMS [ $P < 0.031$ ], which after adjusting for gender,  
176 age, and education, remained significant (Supplementary Table 2B).

## 177 **Recall Variability and the Sources of Recall Error in Multiple** 178 **Sclerosis**

179 To further investigate the underlying mechanisms of WM impairment in MS, the variability of  
180 recall error and sources of this error were assessed. In this regard, the recorded data from n-back  
181 paradigms was fitted to a probabilistic model developed by Bays et al.<sup>18</sup> In line with the results of  
182 recall error and precision, for the 'high memory load' condition, recall variability was significantly  
183 different between groups [ $F(2,114) = 26.79, P < 10^{-9}$ ] and bar order ( $[F(2,114) = 14.95, P < 10^{-6}]$ ,  
184 Fig. 3A). At the same time, they had no significant interaction [ $F(4,114) = 1.19, P = 0.31$ ]. Recall  
185 variability was lower in healthy control [ $0.51 \pm 0.12$ ] than both RRMS [ $0.69 \pm 0.20, P < 10^{-5}$ ] and  
186 SPMS [ $0.76 \pm 0.15, P < 10^{-8}$ ]. There was no difference between RRMS and SPMS in recall  
187 variability [ $P = 0.16$ ]. In the 'low memory load' condition, recall variability was affected by groups  
188 ( $[F(2,114) = 33.07, P < 10^{-11}]$ , Fig. 3A). Again, recall variability was lower in healthy control [ $0.25$   
189  $\pm 0.10$ ] than both RRMS [ $0.38 \pm 0.14, P < 10^{-5}$ ] and SPMS [ $0.47 \pm 0.12, P < 10^{-8}$ ]. There was a  
190 significant difference between RRMS and SPMS in recall variability [ $P < 0.02$ ]. After adjusting  
191 for gender, age, and education, the groups' effect on recall variability remained significant in both  
192 high and low memory load conditions (Supplementary Table 2A and 2B).

193 According to the study by Bays et al.,<sup>18</sup> there are three sources of error for recalling the feature  
194 value in visual WM paradigms with connected features (color and orientation in our designed n-  
195 back paradigm). The sources of these errors were defined as Gaussian variability in response value  
196 around the i: target (recall fidelity, Fig. 3B) and ii: non-target values (misbinding error, Fig. 3C)  
197 and iii: random responses (uniform error, Fig. 3D). In the 'high memory load' condition, recall  
198 fidelity was significantly different between groups [ $F(2,114) = 11.04, P < 10^{-4}$ ] and bar order  
199 ( $[F(2,114) = 9.10, P < 10^{-4}]$ , Fig. 3B). No significant interaction was observed between groups  
200 and bar order [ $F(4,114) = 0.43, P = 0.78$ ]. Recall fidelity was higher in healthy control [ $0.88 \pm$   
201  $0.11$ ] than both RRMS [ $0.79 \pm 0.12, P < 0.003$ ] and SPMS [ $0.76 \pm 0.14, P < 10^{-4}$ ]. There was no  
202 difference in recall fidelity between RRMS and SPMS groups [ $P = 0.54$ ]. After adjusting for  
203 gender, age, and years of education, the effect of groups on recall fidelity remained significant  
204 (Supplementary Table 2A). Moreover, to further evaluate the effect of orientation on results, the  
205 nearest neighbor analysis was performed. Removing the effect of the binding process allowed us  
206 to assess the isolated effect of orientation. The findings from the nearest neighbor analysis showed



207 a similar pattern of results (Supplementary Fig.1). The isolated effect of orientation was significant  
208 between groups [ $F(2,114) = 29.26, P < 10^{-10}$ ] among different bar order [ $F(2,114) = 7.07, P = <$   
209  $10^{-2}$ ]. No significant interaction was observed between group and bar orders [ $F(4,114) = 0.58, P =$   
210  $0.67$ ]. After adjusting for gender, age, and education, the results of nearest neighbor analysis  
211 remained significant (Supplementary Table 2A).

212 In the 'low memory load' condition, groups significantly affected recall fidelity ( $[F(2,114) = 3.11,$   
213  $P < 0.049]$ , Fig. 3B). While recall fidelity of healthy control [ $0.98 \pm 0.03$ ] was significantly higher  
214 than SPMS patients [ $0.94 \pm 0.09, P < 0.04$ ], after adjusting for gender, age, and years of education,  
215 this effect became insignificant (Supplementary Table 2B). In addition, recall fidelity was not  
216 significantly differed in healthy vs. RRMS [ $0.96 \pm 0.08, P = 0.48$ ] and RRMS vs. SPMS  
217 comparisons [ $P = 0.37$ ].

218 In line with the above findings, binding process was also affected in MS. In the 'high memory load'  
219 condition, misbinding error was significantly different between groups [ $F(2,114) = 7.11, P <$   
220  $0.002$ ] and bar order ( $[F(2,114) = 31.05, P = < 10^{-11}]$ , Fig. 3C). No significant interaction was  
221 observed between groups and bar order [ $F(4,114) = 1.45, P = 0.22$ ]. The misbinding error was  
222 lower in healthy control [ $0.07 \pm 0.06$ ] than in both RRMS [ $0.11 \pm 0.09, P < 0.05$ ] and SPMS  
223 patients [ $0.14 \pm 0.09, P < 0.002$ ]. There was no difference in misbinding error between RRMS and  
224 SPMS [ $P = 0.41$ ]. After adjusting for gender, age, and years of education, the groups' effect on  
225 misbinding error remained significant (Supplementary Table 2A). Moreover, while in the 'high  
226 memory load' condition, the uniform error, i.e., random guessing, was different between groups  
227 ( $[F(2,114) = 5.50, P < 0.006]$ , Fig. 3D), no such differences were observed between bar orders  
228 [ $F(2,114) = 0.81, P = 0.45$ ] or the interaction between them [ $F(4,114) = 0.18, P = 0.95$ ]. Post hoc  
229 analysis revealed that uniform error was lower in healthy control [ $0.05 \pm 0.08$ ] than both RRMS  
230 [ $0.09 \pm 0.08, P < 0.03$ ] and SPMS [ $0.10 \pm 0.08, P < 0.02$ ]. Moreover, there was no difference in  
231 uniform error between RRMS and SPMS groups [ $p = 0.95$ ]. Additionally, although after adjusting  
232 for gender, the effect of groups on uniform error remained significant, adding age and years of  
233 education made this effect insignificant (Supplementary Table 2A). The result of a uniform error  
234 in the 'low memory load' condition is mathematically the same as recall fidelity (uniform error =  
235  $1 - \text{recall fidelity}$ , since there was no misbinding error in the 1-back condition).

236



## 237 **Dissociable Function of MGL and n-back Paradigms**

238 The classifying ability of MGL and n-back paradigms in differentiating healthy control from MS  
239 patients was assessed by receiver operating characteristic (ROC) analysis (Fig. 4A-C). The  
240 accuracy of MGL, 3-back, and 1-back paradigms in differentiating MS patients from healthy  
241 participants was 80% (Fig. 4A), 83.4% (Fig. 4B), and 86.2% (Fig. 4C), respectively. A closer look  
242 at Fig. 2A, 2D, and 2G suggested that these paradigms differentiate MS and healthy control with  
243 distinct patterns. Hence, we separately applied ROC analysis to healthy control vs. RRMS, healthy  
244 control vs. SPMS, and RRMS vs. SPMS for MGL (Fig. 4D), 3-back (Fig. 4E), and 1-back (Fig.  
245 4F) paradigms. While the MGL paradigm had good accuracy in differentiating SPMS from healthy  
246 control [90.1%] and SPMS from RRMS [84.7%], it had poor ability in distinguishing healthy  
247 control from RRMS ([64.1%], Fig. 4D). Accordingly, although the 3-back paradigm also had good  
248 accuracy in differentiating healthy control from SPMS [88.4%] and better results (compared to  
249 MGL) in discriminating healthy control from RRMS [79.3%], it did a poor job in discriminating  
250 MS subtypes ([62%], Fig. 4E). Complementary to the above findings, the 1-back paradigm showed  
251 an in-between pattern of results. The 1-back paradigm accurately discriminates healthy control  
252 from SPMS [94.4%], while it also had good performance in differentiating healthy control from  
253 RRMS [79.6%]. However, compared to MGL, it had a weaker ability to discriminate MS subtypes  
254 ([72.3%], Figure 4F).

## 255 **Discussion**

256 In the present study, we investigated the visual working memory (WM) deficits in MS using two  
257 continuous reproduction paradigms, memory-guided localization (MGL) and n-back. Our results  
258 align with the previous reports regarding WM deficit in MS.<sup>4,10-13</sup> Complementary to these reports,  
259 which envisaged a binary model for storing information (slot-based model), we assessed precision  
260 and variability in WM using analog reproduction paradigms (resource-based model). Also, by  
261 utilizing the unique design of our n-back paradigm, which could assess the sources of error in  
262 information recall, we introduced new mechanistic insight into the visual WM dysfunction in MS.  
263 Although the results from both MGL and n-back paradigms showed an overall decrease in recall  
264 precision and increased recall error in MS, the post hoc analysis demonstrated inconsistent results.  
265 In the MGL paradigm, while SPMS patients performed worse than other groups, no significant

266 difference was observed between healthy control and RRMS. This result contrasted with the 3-  
267 back paradigm (high memory load condition) in which MS subtypes (RRMS vs. SPMS) were not  
268 significantly different, and healthy control performed better than RRMS and SPMS. The situation  
269 also varied for the 1-back paradigm in which all three groups performed with different levels of  
270 precision. ROC analysis further confirmed these results, which determined a dissociation between  
271 the classifying performance of MGL and n-back paradigms. Moreover, although the low memory  
272 load condition was better than the high memory load condition in distinguishing MS subtypes, its  
273 classifying performance was not as well as the MGL paradigm. It seems that these paradigms  
274 evaluated distinct aspects of WM dysfunction in MS.

275 The dissociable function of our paradigms could arise from using different types of stimuli  
276 (location in MGL vs. orientation in n-back) in which spatial WM was assessed in the MGL  
277 paradigm. As the spatial WM process was associated with the function of the hippocampus,<sup>27</sup> the  
278 observed difference could indicate more hippocampal disruption in SPMS. This finding is in line  
279 with previous studies that showed more hippocampal regional loss<sup>28</sup> and increased hippocampus  
280 neuroinflammatory activity in SPMS compared to RRMS,<sup>29</sup> suggesting that examination of the  
281 spatial WM could be a specific marker for disorganization of the WM system in SPMS.

282 Another explanation is the long delay intervals in MGL, which assessed the maintenance of  
283 information. Therefore, the observed difference could be due to additional impairment of SPMS  
284 patients in keeping that information. This is in line with our previous study, which showed that  
285 change detection paradigms with long delay intervals were promising in differentiating multiple  
286 sclerosis subtypes.<sup>12</sup> At the same time, one may debate that this difference was related to the longer  
287 stimulus presentation time in the MGL paradigm (1000ms vs. 500ms in n-back). However, since  
288 the stimulus presentation time was adequate in n-back and the stimuli were presented sequentially,  
289 it did not seem that the inadequate time for encoding information was responsible for this  
290 difference.<sup>21,22</sup> Moreover, the different patterns of eye movement could also affect the results.  
291 However, due to the centrality and small size of stimuli in n-back (2.57°), which did not require  
292 eye movement, and the similar patterns of results for distance and delay conditions in the MGL  
293 paradigm in which the effect of distance was removed in delay condition analysis (each distance  
294 was uniformly distributed for each delay interval), it seems less likely that the distinct patterns of  
295 eye movement were responsible for this difference.

296 Additionally, one may argue that the observed dissociation could be due to the extra binding  
297 process needed in the 3-back paradigm. However, the results from the low memory load condition  
298 and our findings from the 3-back nearest-neighbor analysis, which provided a proxy to assess the  
299 isolated effect of orientation, demonstrated a similar pattern of dissociation in the absence of a  
300 binding effect. Based on these findings, we concluded that the binding process was not responsible  
301 for the observed dissociation. Yet, since the evaluated binding process was an intra-term  
302 association (i.e., conjunctive binding), we could not be assured that the same results would be  
303 reached for an inter-term association (i.e., relational binding).<sup>30</sup> This issue becomes more  
304 interesting when we realize that the relational binding function is mainly centered on the  
305 hippocampus,<sup>30–32</sup> the structure we presumed was responsible for the observed dissociation in the  
306 MGL paradigm.

307 Finally, due to the diffuse pattern of involved brain areas in MS and evidence demonstrating that  
308 brain networks accounted for different WM processes, it is reasonable to assume that distinct WM-  
309 related networks, instead of a single region, were responsible for the observed dissociable  
310 patterns.<sup>1,4,25,31,33</sup>

311 To further assess the underlying structure of visual WM dysfunction, we applied a probabilistic  
312 model to uncover the sources of recall error in the n-back paradigm. Our finding from the 3-back  
313 paradigm showed that in addition to error due to noisiness, the inability to bind objects'  
314 information properly was affected in MS. This failure to bind information was seen in various  
315 neurological disorders, including different types of Alzheimer's disease,<sup>23,26,34,35</sup> epileptic patients  
316 with temporal lobe lobectomy,<sup>36</sup> and voltage-gated potassium channel complex antibody (VGKC-  
317 Ab) limbic encephalitis.<sup>37</sup> Based on the assessed type of binding process, these studies proposed  
318 impairment of hippocampal and medial temporal lobe regions in relational and occipital-parietal  
319 regions in conjunctive-based paradigms.<sup>23,26,34–37</sup> Accordingly, our finding was in line with the  
320 studies that showed common patterns of involvement between brain areas associated with  
321 conjunctive processing and WM-affected regions in MS (i.e., superior and inferior parietal  
322 lobule).<sup>4,38</sup> Additionally, based on the evidence showing the involvement of hippocampal regions  
323 in MS,<sup>28,39</sup> we also expect to see relational binding impairment; however, the current study design  
324 did not allow us to evaluate this condition. Eventually, the insignificant results from the low  
325 memory load condition suggested more impairment in visual WM under high memory load  
326 situations, which was not unexpected.

327 Despite all these findings, our study had some limitations. The current study only assessed WM  
328 dysfunction using behavioral paradigms. Further structural and functional evaluations should be  
329 performed to confirm our suggested brain areas associated with conjunctive binding and spatial  
330 WM in MS. Simultaneous assessment of brain networks using fMRI and EEG or volumetric  
331 studies alongside behavioral paradigms could address this issue. Furthermore, although we  
332 hypothesized that relational binding could be a specific marker for the progressive state of the  
333 disease based on the more disruption of hippocampal-related areas in SPMS, the current study  
334 design did not allow us to evaluate this assumption. Future studies aiming to assess the source of  
335 WM deficit regarding relational binding could address this issue. Finally, considering the aim of  
336 this study, i.e., developing a practical apparatus for WM assessment in clinical settings, we did not  
337 use an eye tracker. Although, due to the reasons mentioned earlier, it was unlikely that impaired  
338 eye movement influenced the results, considering the possibility of eye movement dysfunction in  
339 MS,<sup>12</sup> this effect could not be excluded. Hence, further investigation with an eye tracker is  
340 necessary to confirm this issue.

341 In summary, using different analog recall paradigms, we demonstrated that recall precision and  
342 variability were impaired in multiple sclerosis. We provided some evidence regarding the  
343 progressive state of the disease by evaluating the underlying mechanisms related to the dissociable  
344 behavior of these paradigms. Furthermore, by applying a computational model capable of  
345 evaluating the sources of WM dysfunction, we elucidated that decreasing signal-to-noise ratio and  
346 patients' difficulty in associating distinct features together were responsible for WM deficit in MS.  
347 In conclusion, this study provided a sensitive measure for assessing WM impairment and gave  
348 new insight into the organization of WM dysfunction in MS.

## 349 **Materials and methods**

### 350 **1. Participants**

351 A total of 121 patients with confirmed MS (61 RRMS, and 60 SPMS), based on the 2017  
352 McDonald criteria,<sup>40</sup> and 73 healthy control volunteers participated in this study. Participants were  
353 recruited from the Comprehensive Multiple Sclerosis Clinic, Kashani Hospital, Isfahan, between  
354 February 2021 and January 2022. The patients' ages were from 18 to 55 years old, were diagnosed

355 between 1-18 years before entering the study, and had an expanded disability status scale (EDSS)  
356 score of 0-6.5. They had no history of clinical relapse or corticosteroid therapy within 2 months  
357 before entering the study. The control group ages were 21-59 years old and did not have a family  
358 history of MS in their first-degree relatives. Participants had no history of major neurologic or  
359 psychiatric disorders or drug and alcohol abuse. They had normal or corrected-to-normal visual  
360 acuity, color vision, and normal performance in the Nine-Hole Peg Test (9-HPT, < 45 seconds).  
361 Written informed consent was taken from all participants before the start of the study. This study  
362 followed the latest update of the Declaration of Helsinki<sup>41</sup> and was approved by the Iranian national  
363 committee of ethics in biomedical research (Approval ID: IR.MUI.MED.REC.1400.441).

## 364 **2. Visual working memory paradigms**

365 Visual WM was assessed using two analog recall paradigms, memory-guided localization (MGL)  
366 and n-back. Stimuli were presented on a 15" cathode ray tube (CRT, 75Hz refresh rate) monitor at  
367 a distancing view of 48cm. The paradigms were run in a dimly lit room on a computer with a Linux  
368 operating system and MATLAB software (MATLAB 2019a, The MathWorks, Inc., Natick,  
369 Massachusetts, USA) with Psychtoolbox 3 extension.<sup>42,43</sup>

### 370 **2.1. Memory-guided localization**

371 Each trial was initiated by presenting a central fixation point (diameter of  $0.51^\circ$ ) for 2 seconds (s),  
372 followed by the presentation of a target (a filled green circle with a diameter of  $1.29^\circ$ ) for 1s. The  
373 target randomly appeared at different eccentricities ( $3.22^\circ$ ,  $6.44^\circ$ , or  $9.66^\circ$ ) on each trial. In each  
374 block, targets were presented with equal probability at each eccentricity in random order (pseudo-  
375 random selection). While encouraging participants to maintain fixation on the central fixation  
376 point, participants were asked to memorize the location of the target circle for a delay period of  
377 0.5, 1, 2, 4, or 8s (chosen pseudo-randomly). After the delay period, the fixation point changed  
378 from a circle to a cross, indicating the end of the delay period. Participants were asked to locate  
379 the target's position using the computer mouse and confirm their response by pressing the left  
380 button on the mouse. Subsequently, visual feedback was presented, showing them the correct  
381 position of the target and their response (Fig. 1A). Participants completed six blocks of 30 trials.  
382 They also completed a 10-trial training block before the start of the study. Recall error, Euclidian

383 distance between the target's location and subject response in visual degree, and reaction RT were  
384 recorded for further assessment.

## 385 **2.2. n-back**

386 Two designs of n-back paradigms, i.e., the low memory load condition (1-back) and high memory  
387 load condition (3-back), were developed to evaluate the visual WM deficit in MS. In the 'high  
388 memory load' condition, each trial started with a small central fixation point ( $0.26^\circ$ ) for 2s,  
389 followed by a sequence of three distinguishable colored bars (red, green, and blue) at the center of  
390 the screen in a pseudo-random order. Each bar ( $2.57^\circ$  by  $0.19^\circ$ ) was presented for 500ms, followed  
391 by a 500ms blank interval. The minimum angular difference between the consecutively presented  
392 bars was 10 degrees. Participants were asked to memorize both the orientation and color of the  
393 presented bars. After the bars were presented, a single bar, the "probe bar", with the color of one  
394 of the presented bars was displayed. Participants were asked to adjust the orientation of the probe  
395 bar, presented vertically, to match to the orientation of the bar with the same color (target bar). To  
396 do that, they used a computer mouse and confirmed their response by clicking the right button.  
397 They received visual feedback, which showed the correct orientation of the target bar, their  
398 response, and the difference between them in angular degree (Fig. 1B). High memory load  
399 condition consisted of six blocks, each with 30 trials. The 'low memory load' condition had the  
400 same structure as the high memory load condition except for presenting one bar instead of three  
401 (1-back instead of 3-back, Fig. 1C). After the high memory load condition, subjects participated  
402 in 30 trials of the low memory load condition. Due to the 1-back design of low memory load  
403 condition, the misbinding error was not present, so fewer trials were needed.<sup>21</sup> Before starting the  
404 paradigm, they also participated in a 10-trial training block with the same structure as the low  
405 memory load condition. The orientation of presented bars, subject's response, recall error (angular  
406 difference between the target value and response), and RT were recorded.

## 407 **3. Statistical analysis**

408 Statistical analyses were conducted using IBM SPSS Statistics for Mac, version 26 (IBM Corp.,  
409 Armonk, N.Y., USA). The values were reported as mean  $\pm$  standard deviation (SD). Data with  
410 extreme outliers (values greater than 3rd quartile +  $3 \times$  interquartile range or less than 1st quartile –



411 3×interquartile range) in MGL and 3-back were excluded from further analysis. The level of  
412 significance was set at p-value < 0.05.

413 Clinical and demographic profiles of the participants were compared using one-way ANOVA or  
414 Kruskal-Wallis H test (three groups comparison), independent sample t-test or Mann-Whitney U  
415 test (two groups comparison), and Chi-squared test (gender comparison). The post hoc Tukey's  
416 and Dunn's multiple comparison tests were performed following the significant results of ANOVA  
417 and Kruskal-Wallis H test. Also, Bonferroni correction for multiple tests was performed following  
418 Dunn's post hoc analysis, and the adjusted p-value was reported.

419 For the MGL paradigm, recall error, recall precision (defined as the reciprocal of the standard  
420 deviation of recall error), and RT were compared between groups (Healthy, RRMS, and SPMS)  
421 among different conditions (distance or delay, mixed model ANOVA, between- and within-  
422 subjects comparisons). For the n-back paradigm, since the data was in a circular space, based on  
423 the method proposed by Fisher (1993),<sup>44</sup> we used analog report MATLAB toolbox of Bays Lab  
424 (<https://www.paulbays.com/toolbox/>) to calculate circular mean of recall error and recall precision  
425 (defined as reciprocal of the circular standard deviation of recall error). For both high and low  
426 memory load conditions (3-back and 1-back), recall error, recall precision, and RT were compared  
427 between groups with respect to the order of presented bars (mixed model and one-way ANOVA).  
428 To further investigate the sources of error and uncover the involved mechanisms in visual WM  
429 impairment, the Mixture Model (<https://www.paulbays.com/toolbox/>), a probabilistic model  
430 developed before,<sup>18,20</sup> was utilized. The Mixture Model considers three possible sources for  
431 information recall. They are defined as the Gaussian variability in reporting the target and non-  
432 target values and random responses.<sup>18,20</sup> In our study, they referred to reporting the orientation of  
433 the target bar (recall fidelity), misreporting the orientation of the other two non-target bars instead  
434 of the target bar (misbinding error), and random guessing (uniform error). By utilizing the Mixture  
435 Model, the probabilities of target, non-target, and random responses and the concentration score  
436 of the Von Mises distribution were calculated for each subject. The sources of error were evaluated  
437 by comparing the probability of target, non-target, and random responses between groups among  
438 different bar orders (mixed model ANOVA). Also, recall variability, defined as the circular  
439 standard deviation of the concentration score of von Mises distribution, was assessed using the  
440 same method. Moreover, to further evaluate the effect of the binding process and the isolated effect  
441 of orientation, nearest neighbor analysis was performed.<sup>37</sup> In this set of analyses, we removed the

442 binding effect by defining recall error as the difference between the subject response and the  
443 nearest presented bar in each trial. The isolated effect of orientation was assessed between groups  
444 among different bar orders (mixed model ANOVA). Finally, due to the 1-back design of the low  
445 memory load condition, the misbinding error was not present; hence only the recall fidelity,  
446 uniform error, and recall variability were compared.

447 For each comparison, hierarchical regression analyses were performed to evaluate the possible  
448 confounding effect of demographic variables (significantly different between groups) on results.

449 Finally, the dissociable function of n-back and MGL paradigms in distinguishing healthy control  
450 from MS patients, healthy control from MS subtypes, and MS subtypes from each other was  
451 assessed by performing ROC analysis. The AUC was considered as the classifying accuracy.

452

## 453 **Data availability**

454 Anonymized data will be available upon request from corresponding authors. The corresponding  
455 authors will consider the request against the data-sharing policy in the protocol and ethical  
456 approval of the study.

457

## 458 **Code availability**

459 The source codes for the analog report MATLAB toolbox are available at  
460 <https://www.paulbays.com/toolbox/>.

461

462

463

464

465

466

467

## 468 **Acknowledgment**

469 We sincerely thank Farinaz Tabibian, Leila Sadat Razian, Maryam Mokhtari, and Zahra Mohamad  
470 Hoseiny for their cooperation in coordinating patients, Shahrzad Mohammadpour for advice about  
471 model fitting, and Mohammadamin Motaharinia for help regarding programming issues and his  
472 comments on the first draft of this manuscript.

473

## 474 **Funding**

475 This study was supported by Isfahan University of Medical Sciences (grant number: 2400104).

476

## 477 **Author contributions**

478 Conceptualization: A.M, A.P, I.A, M.S. Paradigms development: A.M, A.P, M.S. Data  
479 acquisition: A.M, A.P, A.A. Statistical analysis: A.M, I.A, M.S. Data interpretation: A.M, A.P,  
480 I.A, M.S. Drafting/revising the manuscript: All authors. Supervision: I.A, M.S. Funding  
481 Acquisition: V.S, F.A, I.A. All the authors have read and approved the final version for publication.

482

## 483 **Competing interest**

484 The authors declare no competing interests.

485

## 486 **Supplementary material**

487 Supplementary material is available at *bioRxiv* online.

488

489

490

491

492

493

## 494 **References**

- 495 1. Dobson R, Giovannoni G. Multiple sclerosis – a review. *Eur J Neurol*. 2019;26(1):27-40.  
496 doi:10.1111/ene.13819
- 497 2. Benedict RHB, Amato MP, DeLuca J, Geurts JGG. Cognitive impairment in multiple sclerosis: clinical  
498 management, MRI, and therapeutic avenues. *Lancet Neurol*. 2020;19(10):860-871. doi:10.1016/S1474-  
499 4422(20)30277-5
- 500 3. Clemens L, Langdon D. How does cognition relate to employment in multiple sclerosis? A systematic  
501 review. *Mult Scler Relat Disord*. 2018;26:183-191. doi:10.1016/j.msard.2018.09.018
- 502 4. Vacchi L, Rocca MA, Meani A, et al. Working memory network dysfunction in relapse-onset multiple  
503 sclerosis phenotypes: A clinical-imaging evaluation. *Mult Scler J*. 2017;23(4):577-587.  
504 doi:10.1177/1352458516656809
- 505 5. Miller EK, Lundqvist M, Bastos AM. Working Memory 2.0. *Neuron*. 2018;100(2):463-475.  
506 doi:10.1016/j.neuron.2018.09.023
- 507 6. Nee DE, D'Esposito M. The Representational Basis of Working Memory. In: ; 2016:213-230.  
508 doi:10.1007/7854\_2016\_456
- 509 7. Hulst HE, Goldschmidt T, Nitsche MA, et al. rTMS affects working memory performance, brain activation  
510 and functional connectivity in patients with multiple sclerosis. *J Neurol Neurosurg Psychiatry*.  
511 2017;88(5):386-394. doi:10.1136/jnnp-2016-314224
- 512 8. Covey TJ, Zivadinov R, Shucard JL, Shucard DW. Information processing speed, neural efficiency, and  
513 working memory performance in multiple sclerosis: Differential relationships with structural magnetic  
514 resonance imaging. *J Clin Exp Neuropsychol*. 2011;33(10):1129-1145. doi:10.1080/13803395.2011.614597
- 515 9. Rocca MA, Valsasina P, Hulst HE, et al. Functional correlates of cognitive dysfunction in multiple sclerosis:  
516 A multicenter fMRI Study. *Hum Brain Mapp*. 2014;35(12):5799-5814. doi:10.1002/hbm.22586
- 517 10. Costers L, Van Schependom J, Laton J, et al. The role of hippocampal theta oscillations in working memory  
518 impairment in multiple sclerosis. *Hum Brain Mapp*. 2021;42(5):1376-1390. doi:10.1002/hbm.25299
- 519 11. PARMENTER BA, SHUCARD JL, BENEDICT RHB, SHUCARD DW. Working memory deficits in  
520 multiple sclerosis: Comparison between the n-back task and the Paced Auditory Serial Addition Test. *J Int*  
521 *Neuropsychol Soc*. 2006;12(5):677-687. doi:10.1017/S1355617706060826
- 522 12. Pourmohammadi A, Motaharynia A, Shaygannejad V, Ashtari F, Adibi I, Sanayei M. Working memory  
523 dysfunction differs between secondary progressive and relapsing multiple sclerosis: effects of clinical  
524 phenotype, age, disease duration, and disability. *Mult Scler Relat Disord*. Published online November  
525 2022:104411. doi:10.1016/j.msard.2022.104411
- 526 13. Stojanovic-Radic J, Wylie G, Voelbel G, Chiaravalloti N, DeLuca J. Neuroimaging and cognition using  
527 functional near infrared spectroscopy (fNIRS) in multiple sclerosis. *Brain Imaging Behav*. 2015;9(2):302-  
528 311. doi:10.1007/s11682-014-9307-y
- 529 14. Ma WJ, Husain M, Bays PM. Changing concepts of working memory. *Nat Neurosci*. 2014;17(3):347-356.  
530 doi:10.1038/nn.3655

- 531 15. MILLER GA. The magical number seven plus or minus two: some limits on our capacity for processing  
532 information. *Psychol Rev.* 1956;63(2):81-97. <http://www.ncbi.nlm.nih.gov/pubmed/13310704>
- 533 16. Cowan N. The magical number 4 in short-term memory: A reconsideration of mental storage capacity.  
534 *Behav Brain Sci.* 2001;24(1):87-114. doi:10.1017/S0140525X01003922
- 535 17. Bays PM, Husain M. Dynamic Shifts of Limited Working Memory Resources in Human Vision. *Science*  
536 (80- ). 2008;321(5890):851-854. doi:10.1126/science.1158023
- 537 18. Bays PM, Catalao RFG, Husain M. The precision of visual working memory is set by allocation of a shared  
538 resource. *J Vis.* 2009;9(10):7-7. doi:10.1167/9.10.7
- 539 19. Gorgoraptis N, Catalao RFG, Bays PM, Husain M. Dynamic Updating of Working Memory Resources for  
540 Visual Objects. *J Neurosci.* 2011;31(23):8502-8511. doi:10.1523/JNEUROSCI.0208-11.2011
- 541 20. Schneegans S, Bays PM. No fixed item limit in visuospatial working memory. *Cortex.* 2016;83:181-193.  
542 doi:10.1016/j.cortex.2016.07.021
- 543 21. Peich MC, Husain M, Bays PM. Age-related decline of precision and binding in visual working memory.  
544 *Psychol Aging.* 2013;28(3):729-743. doi:10.1037/a0033236
- 545 22. Zokaei N, Burnett Heyes S, Gorgoraptis N, Budhdeo S, Husain M. Working memory recall precision is a  
546 more sensitive index than span. *J Neuropsychol.* 2015;9(2):319-329. doi:10.1111/jnp.12052
- 547 23. Zokaei N, Sillence A, Kienast A, et al. Different patterns of short-term memory deficit in Alzheimer's  
548 disease, Parkinson's disease and subjective cognitive impairment. *Cortex.* 2020;132:41-50.  
549 doi:10.1016/j.cortex.2020.06.016
- 550 24. McMaster JMV, Tomić I, Schneegans S, Bays PM. Swap errors in visual working memory are fully  
551 explained by cue-feature variability. *Cogn Psychol.* 2022;137:101493. doi:10.1016/j.cogpsych.2022.101493
- 552 25. Lugtmeijer S, Schneegans S, Lammers NA, et al. Consequence of stroke for feature recall and binding in  
553 visual working memory. *Neurobiol Learn Mem.* 2021;179:107387. doi:10.1016/j.nlm.2021.107387
- 554 26. Liang Y, Pertzov Y, Nicholas JM, et al. Visual short-term memory binding deficit in familial Alzheimer's  
555 disease. *Cortex.* 2016;78:150-164. doi:10.1016/j.cortex.2016.01.015
- 556 27. Rolls ET. The storage and recall of memories in the hippocampo-cortical system. *Cell Tissue Res.*  
557 2018;373(3):577-604. doi:10.1007/s00441-017-2744-3
- 558 28. Sicotte NL, Kern KC, Giesser BS, et al. Regional hippocampal atrophy in multiple sclerosis. *Brain.*  
559 2008;131(4):1134-1141. doi:10.1093/brain/awn030
- 560 29. Cree BAC, Arnold DL, Chataway J, et al. Secondary Progressive Multiple Sclerosis. *Neurology.*  
561 2021;97(8):378-388. doi:10.1212/WNL.00000000000012323
- 562 30. Parra MA, Fabi K, Luzzi S, Cubelli R, Hernandez Valdez M, Della Sala S. Relational and conjunctive  
563 binding functions dissociate in short-term memory. *Neurocase.* 2015;21(1):56-66.  
564 doi:10.1080/13554794.2013.860177
- 565 31. Bastin C, Besson G, Simon J, et al. An integrative memory model of recollection and familiarity to  
566 understand memory deficits. *Behav Brain Sci.* 2019;42:e281. doi:10.1017/S0140525X19000621
- 567 32. Bastin C, Besson G. Aging and binding in short-term memory: processes involved in conjunctive and

- 568 relational binding. *Memory*. 2021;29(2):193-209. doi:10.1080/09658211.2021.1873390
- 569 33. Figueroa-Vargas A, Cárcamo C, Henríquez-Ch R, et al. Frontoparietal connectivity correlates with working  
570 memory performance in multiple sclerosis. *Sci Rep*. 2020;10(1):9310. doi:10.1038/s41598-020-66279-0
- 571 34. Della Sala S, Parra MA, Fabi K, Luzzi S, Abrahams S. Short-term memory binding is impaired in AD but  
572 not in non-AD dementias. *Neuropsychologia*. 2012;50(5):833-840.  
573 doi:10.1016/j.neuropsychologia.2012.01.018
- 574 35. Cecchini MA, Parra MA, Brazzelli M, Logie RH, Della Sala S. Short-term memory conjunctive binding in  
575 Alzheimer's disease: A systematic review and meta-analysis. *Neuropsychology*. Published online May 26,  
576 2022. doi:10.1037/neu0000825
- 577 36. Zokaei N, Nour MM, Sillence A, et al. Binding deficits in visual short-term memory in patients with  
578 temporal lobe lobectomy. *Hippocampus*. 2019;29(2):63-67. doi:10.1002/hipo.22998
- 579 37. Pertzov Y, Miller TD, Gorgoraptis N, et al. Binding deficits in memory following medial temporal lobe  
580 damage in patients with voltage-gated potassium channel complex antibody-associated limbic encephalitis.  
581 *Brain*. 2013;136(8):2474-2485. doi:10.1093/brain/awt129
- 582 38. Parra MA, Della Sala S, Logie RH, Morcom AM. Neural correlates of shape-color binding in visual  
583 working memory. *Neuropsychologia*. 2014;52:27-36. doi:10.1016/j.neuropsychologia.2013.09.036
- 584 39. Rocca MA, Barkhof F, De Luca J, et al. The hippocampus in multiple sclerosis. *Lancet Neurol*.  
585 2018;17(10):918-926. doi:10.1016/S1474-4422(18)30309-0
- 586 40. Thompson AJ, Banwell BL, Barkhof F, et al. Diagnosis of multiple sclerosis: 2017 revisions of the  
587 McDonald criteria. *Lancet Neurol*. 2018;17(2):162-173. doi:10.1016/S1474-4422(17)30470-2
- 588 41. World Medical Association Declaration of Helsinki. *JAMA*. 2013;310(20):2191.  
589 doi:10.1001/jama.2013.281053
- 590 42. Brainard DH. The Psychophysics Toolbox. *Spat Vis*. 1997;10(4):433-436.  
591 <http://www.ncbi.nlm.nih.gov/pubmed/9176952>
- 592 43. Pelli DG. The VideoToolbox software for visual psychophysics: transforming numbers into movies. *Spat*  
593 *Vis*. 1997;10(4):437-442. <http://www.ncbi.nlm.nih.gov/pubmed/9176953>
- 594 44. Fisher NI. *Statistical Analysis of Circular Data*. Cambridge University Press; 1993.  
595 doi:10.1017/CBO9780511564345
- 596
- 597
- 598
- 599
- 600
- 601
- 602
- 603



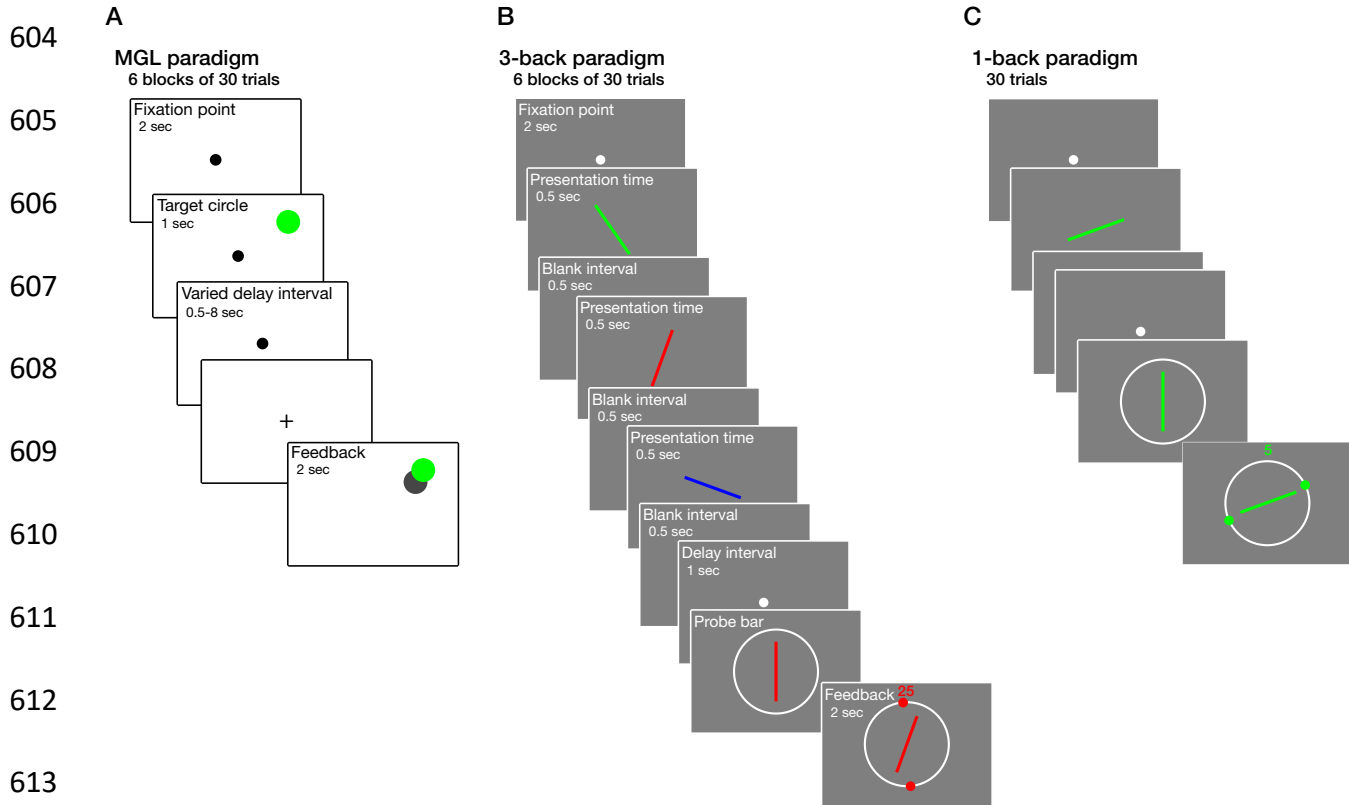

615 **Figure 1. Schematic design of visual working memory (WM) paradigms.** (A) In the memory-  
616 guided localization (MGL) paradigm, participants were asked to memorize and then localize the  
617 position of the target circle following a random delay interval of 0.5, 1, 2, 4, or 8 seconds.  
618 Following their response, visual feedback was presented. (B) In the 3-back paradigm (high  
619 memory load condition), a sequence of three colored bars was presented consecutively.  
620 Participants were asked to match the orientation of the probe bar to the previously presented bar  
621 with the same color. Visual feedback was displayed following their response. (C) The 1-back  
622 paradigm (low memory load condition) has the same structure as 3-back except for presenting  
623 one bar instead of three.

624  
625  
626  
627  
628  
629

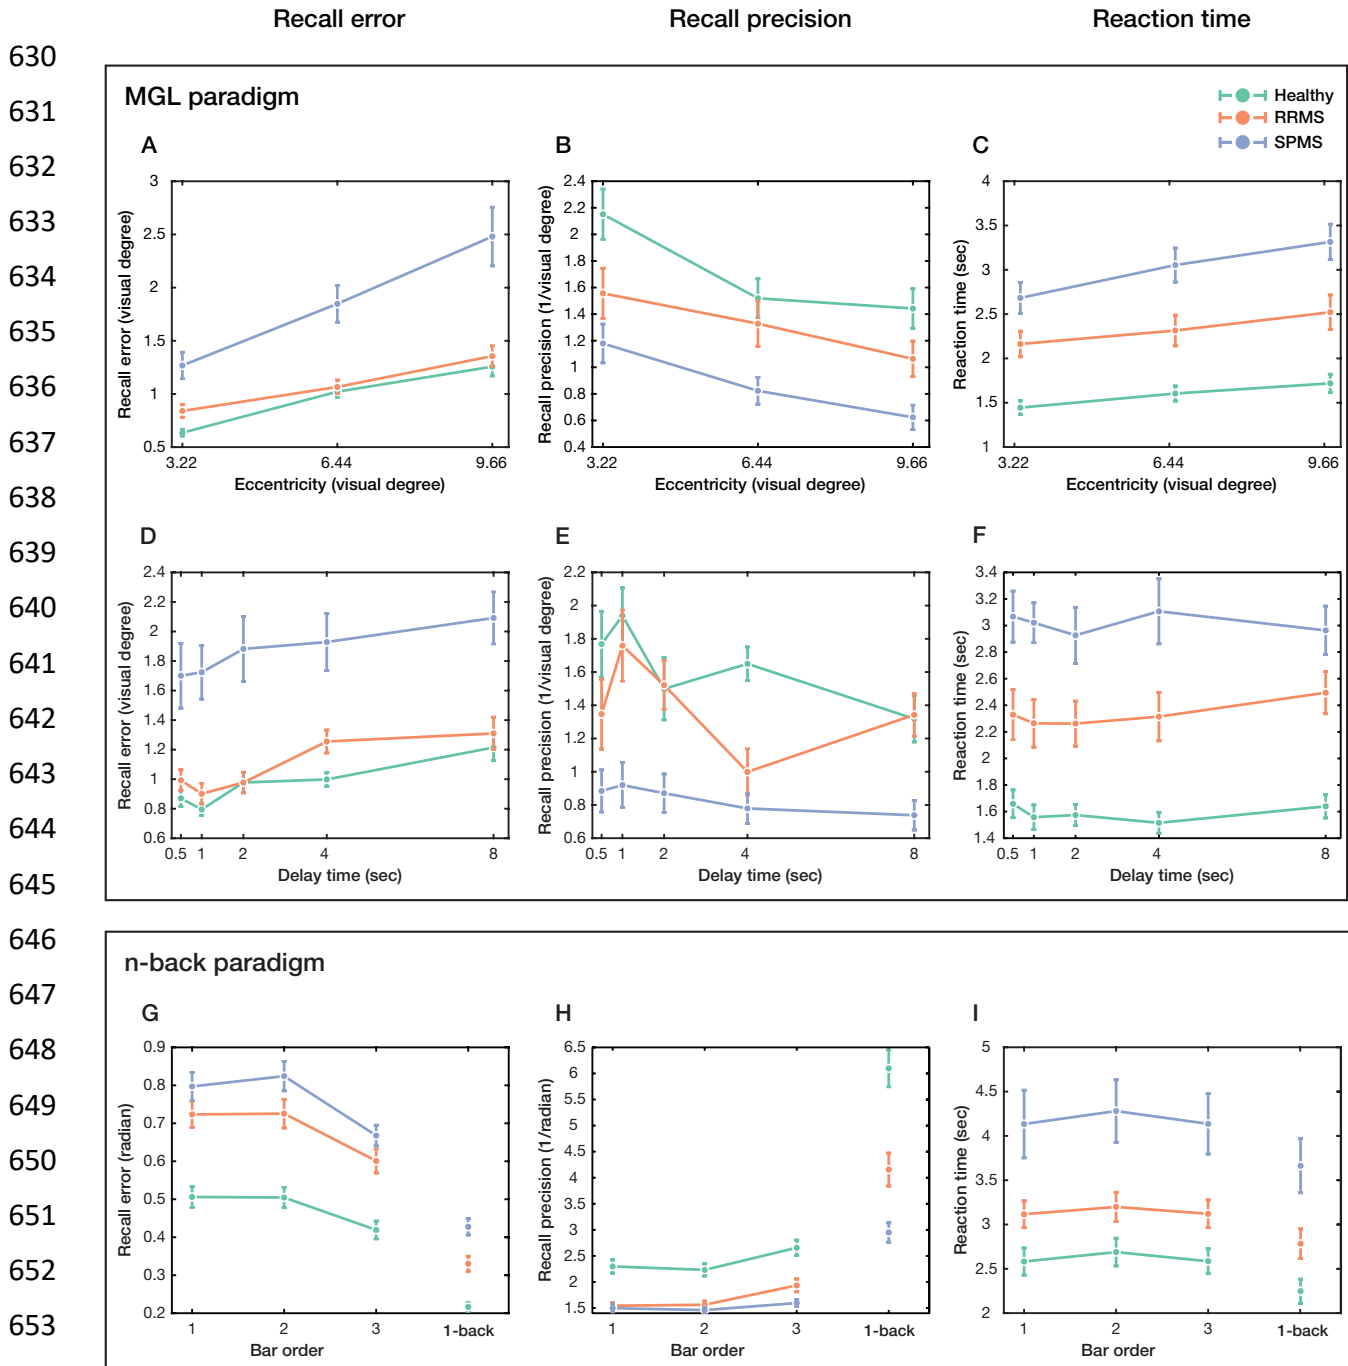

655 **Figure 2. Recall error and precision of healthy control and multiple sclerosis (MS) subtypes**  
 656 **(relapsing-remitting, RRMS and secondary progressive, SPMS) in visual WM paradigms.**  
 657 **(A)** Recall error, **(B)** recall precision, **(C)** and reaction time as a function of distance for MGL  
 658 paradigm. **(D, E, and F)** The same as a function of delay interval. **(G)** Recall error and **(H)**  
 659 precision and **(I)** reaction time as a function of bar order in 3-back paradigm (left) and 1-back  
 660 paradigm (right). Data are represented as mean  $\pm$  SEM.

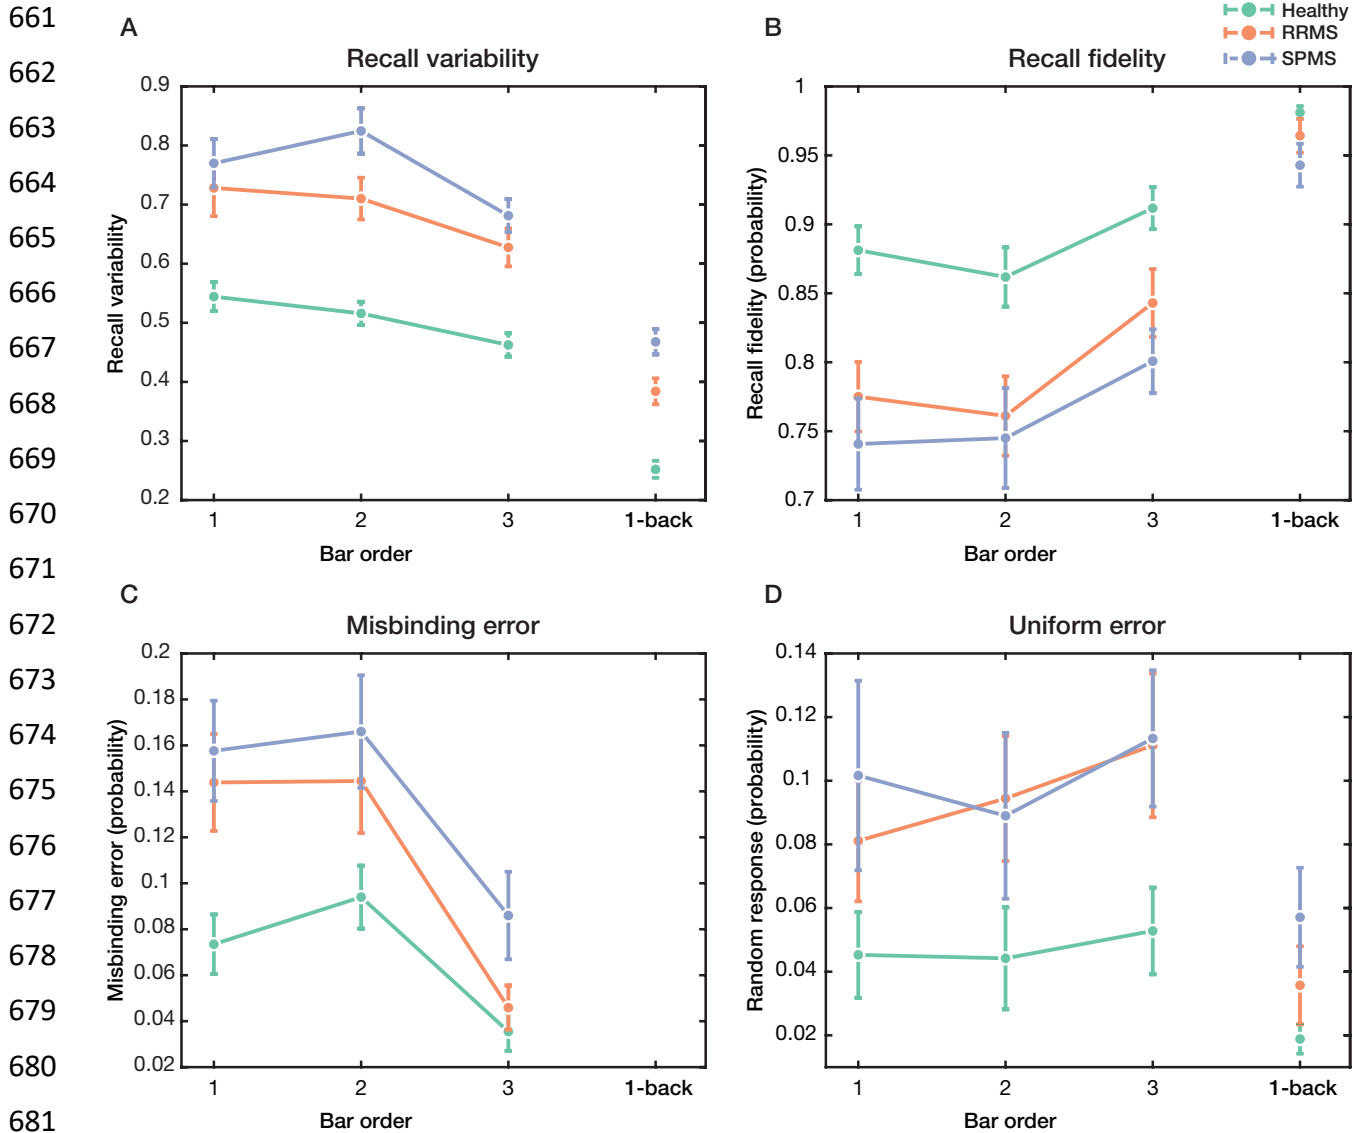

683 **Figure 3. The sources of recall error in high and low memory load conditions (3-back and**  
 684 **1-back, respectively).** (A) Recall variability (circular standard deviation of von Mises  
 685 distribution), (B) recall fidelity (probability of response around the target value), (C) misbinding  
 686 error (probability of response around the non-target values), and (D) uniform error (probability  
 687 of random response) for healthy control and MS subtypes in 3-back paradigm (left of each  
 688 subplot) and 1-back paradigm (right of each subplot). Data are represented as mean  $\pm$  SEM.

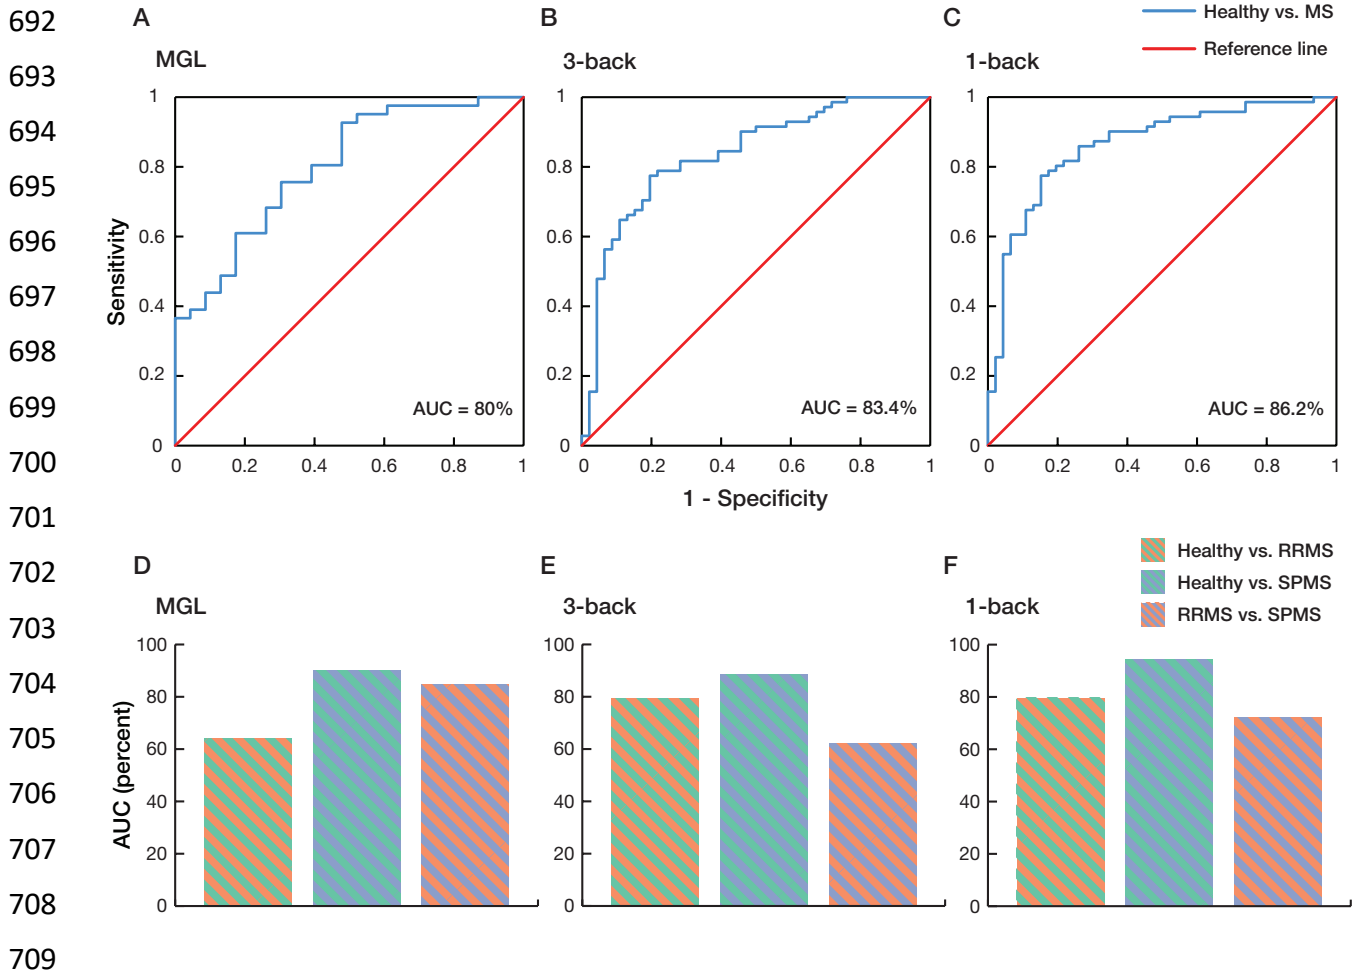

710 **Figure 4. Classifying performance of visual WM paradigms in differentiating healthy**  
711 **control from MS and MS subtypes, and MS subtypes from each other.** Receiver operating  
712 characteristic (ROC) curve demonstrated the accuracy of (A) MGL, (B) 3-back, and (C) 1-back  
713 paradigms in distinguishing healthy control from MS patients. The precision of these paradigms  
714 in dissociating healthy control from MS subtypes (RRMS and SPMS) and MS subtypes from  
715 each other is represented as the area under curve (AUC) for (D) MGL, (E) 3-back, and (F) 1-  
716 back paradigms.

717  
718  
719  
720  
721  
722

723 **Table 1A. Demographic and clinical profiles of participants in the MGL paradigm**

|                                 | <b>HC (n = 23)</b> | <b>RRMS (n = 16)</b> | <b>SPMS (n = 25)</b> | <b><i>P</i></b> |
|---------------------------------|--------------------|----------------------|----------------------|-----------------|
| <b>Gender (F:M)</b>             | 13:10              | 14:2                 | 17:8                 | 0.12            |
| <b>Age</b>                      | 35.91 (8.34)       | 37.25 (6.63)         | 39.28 (5.56)         | 0.25            |
| <b>Education (years)</b>        | 13.30 (2.74)       | 13.69 (3.34)         | 13.56 (3.22)         | 0.86            |
| <b>Disease duration (years)</b> | N/A                | 8.562 (3.20)         | 11.56 (3.28)         | < 0.02 *        |
| <b>EDSS</b>                     | N/A                | 1.28 (0.79)          | 2.740 (1.23)         | < 0.0002 *      |

724

725 HC = Healthy control, RRMS = Relapsing-remitting multiple sclerosis, SPMS = Secondary progressive multiple sclerosis, EDSS = Expanded

726 disability status scale, N/A = Not applicable

727 \**P* < 0.05

728

729

730 **Table 1B. Demographic and clinical profiles of participants in the n-back paradigms**

|                                      | <b>HC (n = 46)</b> | <b>RRMS (n = 39)</b> | <b>SPMS (n = 32)</b> | <b><i>P</i></b>      |
|--------------------------------------|--------------------|----------------------|----------------------|----------------------|
| <b>Gender (F:M)</b>                  | 16:30              | 23:16                | 22:10                | < 0.008 *            |
| <b>Age<sup>a</sup></b>               | 30.5 (10.37)       | 32.03 (6.72)         | 39.00 (6.43)         | < 10 <sup>-6</sup> * |
| <b>Education<sup>b</sup> (years)</b> | 16.95 (2.23)       | 13.87 (3.41)         | 13.67 (2.73)         | < 10 <sup>-7</sup> * |
| <b>Disease duration (years)</b>      | N/A                | 6.60 (3.84)          | 9.37 (4.43)          | < 0.007 *            |
| <b>EDSS</b>                          | N/A                | 1.49 (1.01)          | 3.86 (1.74)          | < 10 <sup>-7</sup> * |

731

732 <sup>a</sup>Dunn's test: (Healthy vs. RRMS: *P* = 0.27, Healthy vs. SPMS: *P* < 10<sup>-6</sup>\*, and RRMS vs SPMS: *P* < 0.005\*)

733 <sup>b</sup>Dunn's test: (Healthy vs. RRMS: *P* < 10<sup>-5</sup>\*, Healthy vs. SPMS: *P* < 10<sup>-5</sup>\*, and RRMS vs. SPMS: *P* = 1)

734 \**P* < 0.05
